# Supplementary material
Source: publisher site journal article supplement (https://www.dovepress.com/get_supplementary_file.php?f=237969.xlsx)
Supplement: Supplementary file 1 [file get_supplementary_file.php]

## Sheet: supplemental table
	Supplemental Table: Concomitant medication with brimonidine
					No. of cases
	One-drug group				7
	Latanoprost				3
	Travoprost				2
	Tafluprost				2
	Two-drugs combination group				6
	Latanoprost	Timolol maleate			1
	Latanoprost	Dorzolamide			1
	Travoprost	Timolol maleate			1
	Travoprost	Nipradilol			1
	Tafluprost	Nipradilol			1
	Timolol maleate	Brinzolamide			1
	Three-drugs combination group				7
	Latanoprost	Timolol maleate	Dorzolamide		3
	Latanoprost	Carteolol	Brinzolamide		1
	Latanoprost	Timolol maleate	Pilocarpine		1
	Travoprost	Timolol maleate	Dorzolamide		1
	Travoprost	Timolol maleate	Nipradilol		1
	Four-drugs combination group				2
	Bimatoprost	Timolol maleate	Dorzolamide	Bunazosin	2
